# Supplementary material for: New Interactors of the Truncated EBNA-LP Protein Identified by Mass Spectrometry in P3HR1 Burkitt’s Lymphoma Cells
Source: MDPI journal article supplement (doi:10.3390/cancers10010012), 2018-01-05

# Supplementary Materials: New Interactors of the Truncated EBNA-LP Protein Identified by Mass Spectrometry in P3HR1 Burkitt's Lymphoma Cells

Sonia Chelouah, Emilie Cochet, Sophie Couvé, Sandy Balkaran, Aude Robert, Evelyne May, Vasily Ogryzko and Joëlle Wiels

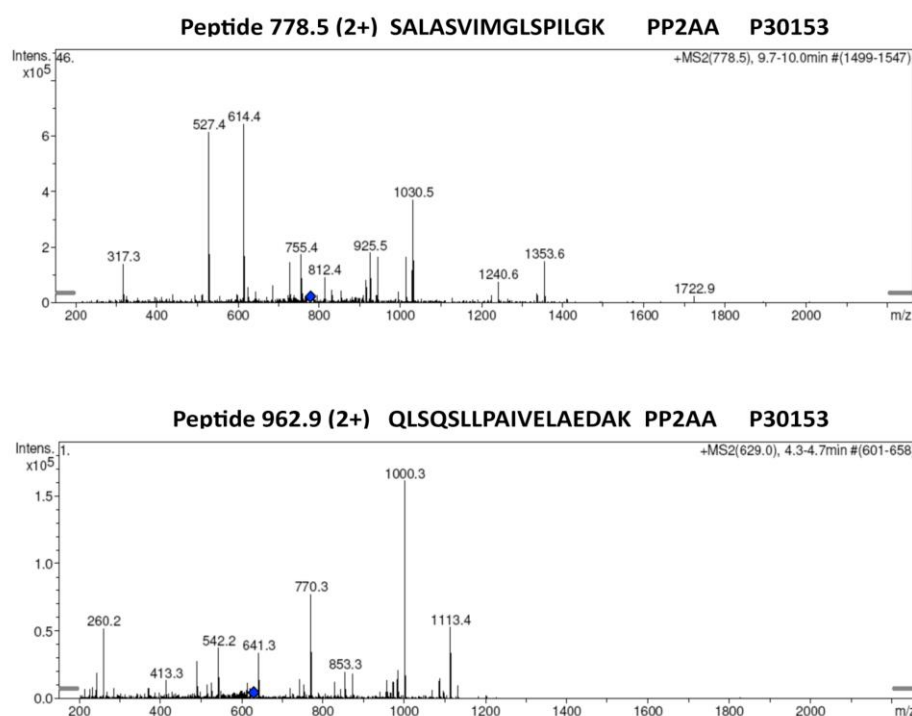

**Figure S1.** MS/MS spectra of the PP2A peptides SALASVIMGLSPILGK and QLSQSLPAIVELAEDAK detected by MRM in the immunoprecipitates.

**Table S1.** Categories of disease involving the tEBNA-LP partners

| Categories of disease           | Molecules                                                                                                                              | Numbers of molecules |
|---------------------------------|----------------------------------------------------------------------------------------------------------------------------------------|----------------------|
| Genetic Disorder                | FGB, FGG, CP, HP, LDHA, LDHB, PFN1, SETDB1, DKC1, AGL, FN1, GARNL3, HSPE1, LAMA4, LOC57653, NOS2, OSBPL3, PTPN13/FAP1, TJP2, MLL, A2M. | 21                   |
| Cancer                          | CP, EZR, FGG, FN1, HP, HSPE1, LAMA4, LDHA, NOS2, PFN1, DKC1, MLL, A2M, DIS3.                                                           | 14                   |
| Neurological Disease            | CP, FGG, GARNL3, HP, LDHA, LDHB, NOS2, PFN1, PTPN13/FAP1, SETDB1, TJP2, FN1, LAMA4, A2M.                                               | 14                   |
| Skeletal and Muscular Disorders | CP, FGG, HP, LDHA, LDHB, PFN1, SETDB1, FN1, NOS2, FGB, PPP2R1A, A2M.                                                                   | 11                   |
| Hematological Disease           | FGB, FGG, LAMA4, FN1, PPP2R1A, NOS2, OSBPL3, DIS3, MLL.                                                                                | 9                    |

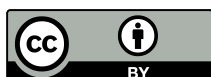

Supplement: s1 [file s1]
